# Supplementary material for: Inherent area-selective atomic layer deposition of ZnS
Source: Royal Society of Chemistry journal article supplement (doi:10.1039/d3dt01435e), 2023-01-01
Supplement: d3dt01435e1.pdf [file d3dt01435e1.pdf]

Supporting Information

### Inherent Area-Selective Atomic Layer Deposition of ZnS

Chao Zhang\*, Marko Vehkamäkia, Markku Leskelä, Mikko Ritala

Department of Chemistry, University of Helsinki, P.O. Box 55, 00014 Helsinki, Finland

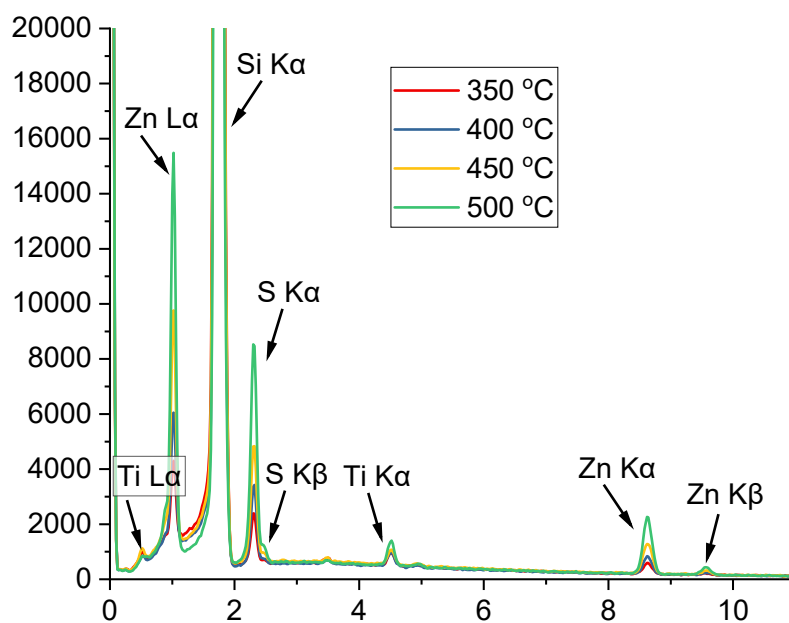

**Figure S1:** EDX spectra for the ZnS films that were deposited on Ti at 350, 400, 450, and 500 °C.

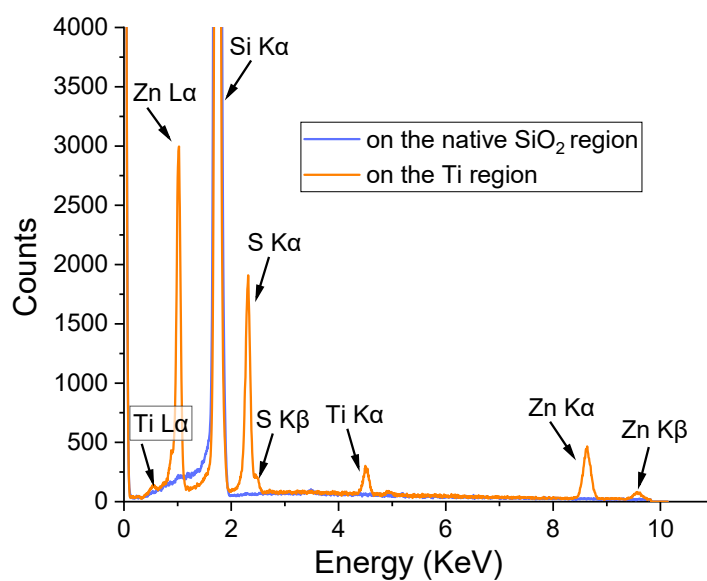

**Figure S2:** EDX spectra measured on the Ti and native SiO<sub>2</sub> regions on the Ti/native SiO<sub>2</sub> patterns after the ZnS deposition.
